# Supplementary material for: Observed northward shift of large hailstorms in the eastern United States since 2000
Source: Research Square preprint supplement (doi:10.21203/rs.3.rs-3217821/v1), 2023-11-10
Supplement: Supplementary file 1 [file afb7ac4b8248c4f5f491fba0.docx]

Supplementary Information for

***Observed northward shift of large hailstorms in the eastern United States since 2000***

Jimin Liu1,2,3, Jeremy Cheuk-Hin Leung3*, Hong Huang4*, Daosheng Xu3, Weijing Li3, Weihong Qian3,5, Banglin Zhang1,2,3

**Affiliations**

1 College of Atmospheric Sciences, Lanzhou University, Lanzhou, China

2 Department of Atmospheric Science, School of Environmental Studies, China University of Geosciences, Wuhan, China

3 Guangzhou Institute of Tropical and Marine Meteorology/Guangdong Provincial Key Laboratory of Regional Numerical Weather Prediction, CMA, Guangzhou, China

4 College of Meteorology and Oceanography, National University of Defense Technology, Changsha, China

5 Department of Atmospheric and Oceanic Sciences, Peking University, Beijing, China

Supplementary figures


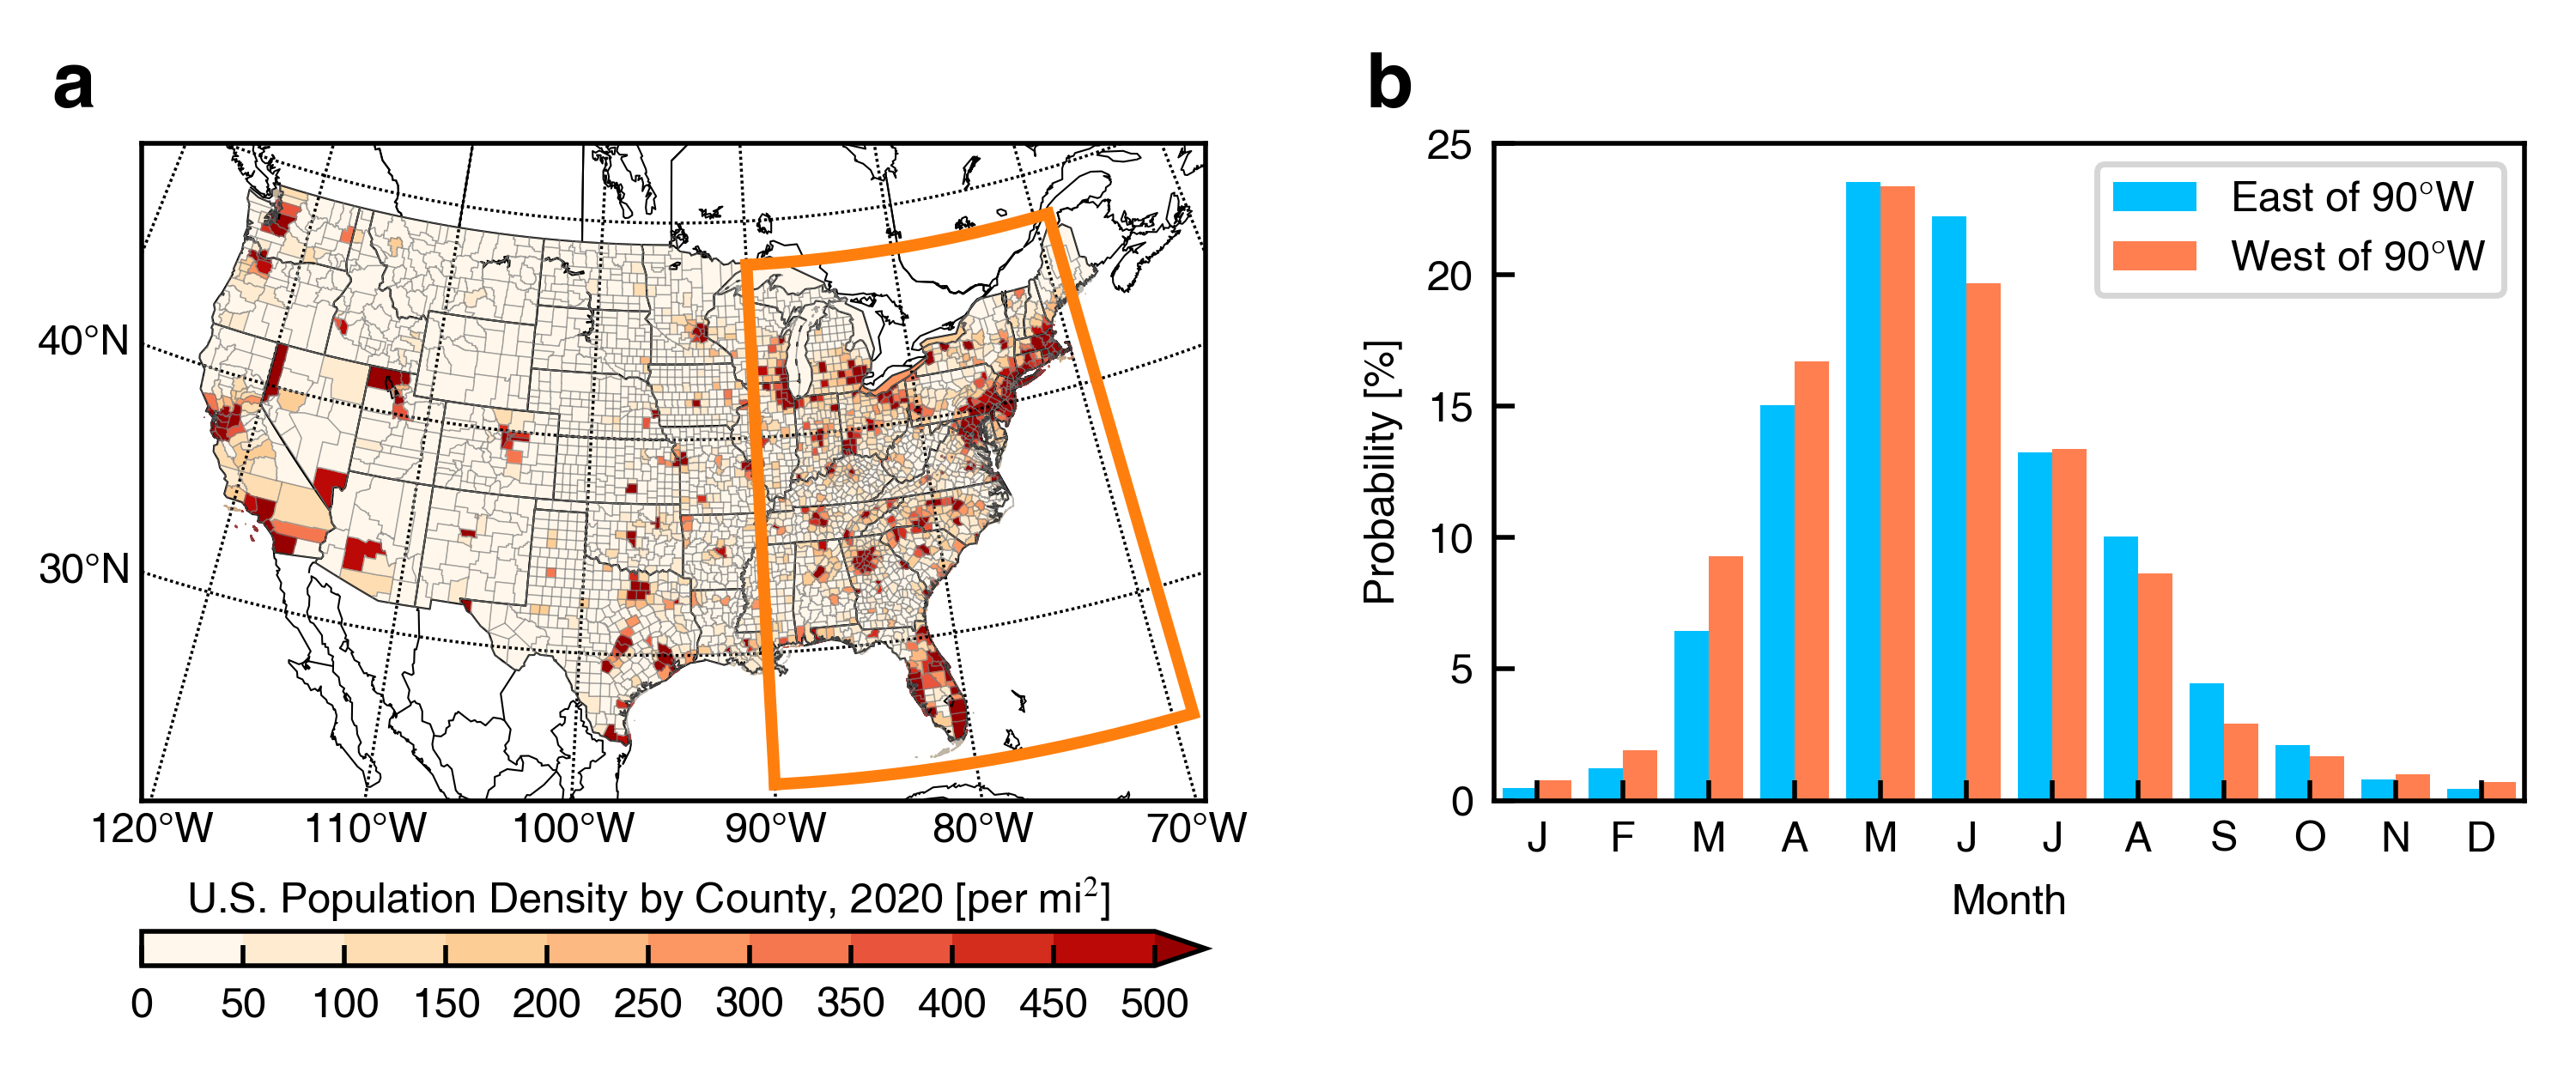


**Figure S1 | Population density and hail season in the eastern US. a,** Spatial distribution of the US population density (unit: people mi-2) in 2020, according to the United States Counties Database. The orange box marks the eastern US (east of 90°W), the region of interest in this study. **b,** Occurring probability (unit: %) of all hail events (*dhail* ≥ 0.75) reported over the eastern US (blue bars) and the remaining US (orange bars, except Alaska and Hawaii) in each month from 2000–2022.


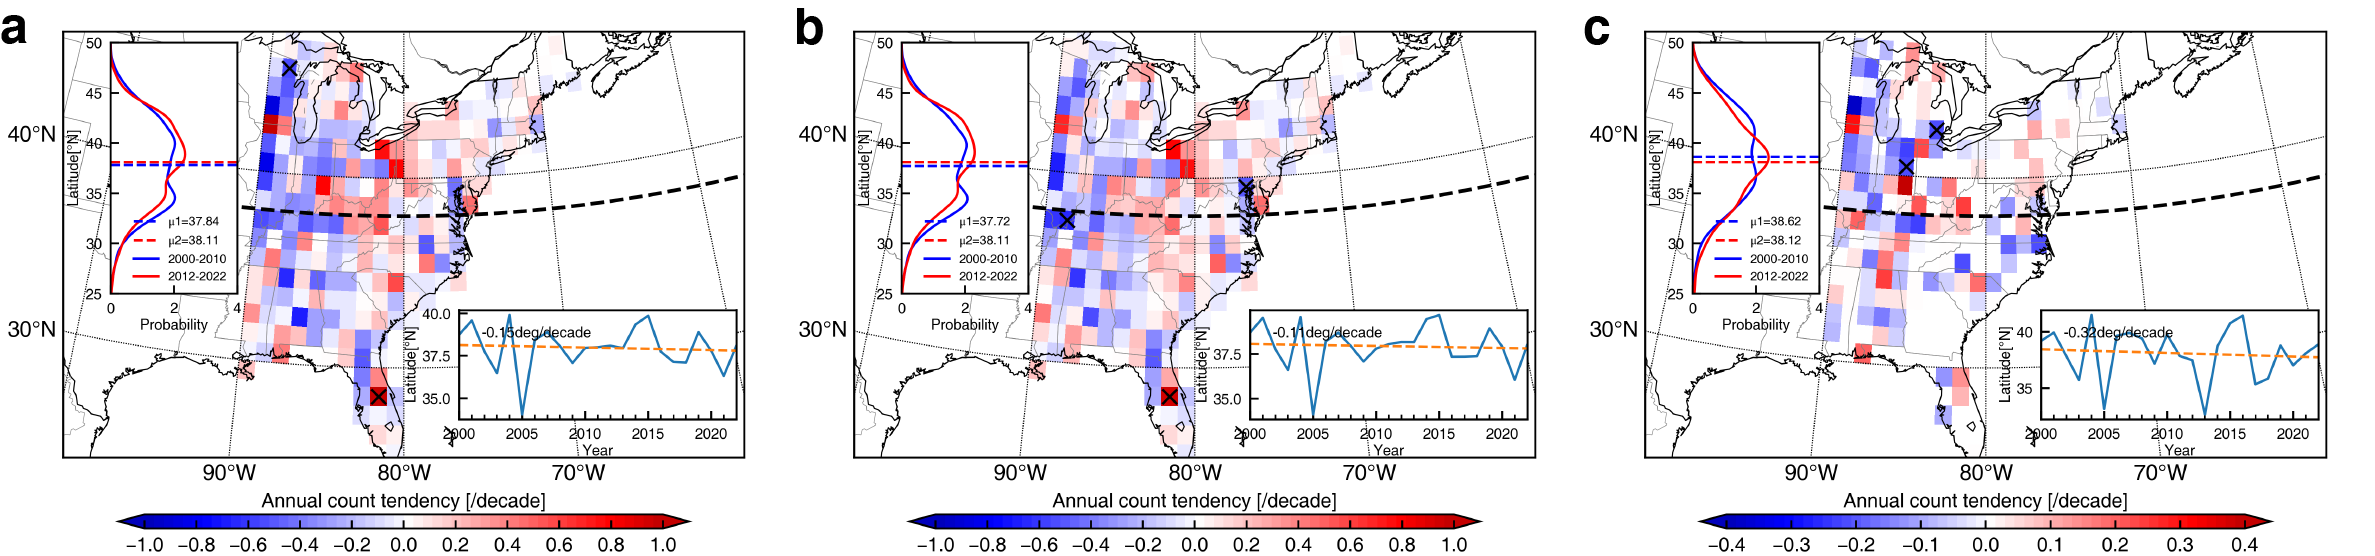


**Figure S2 | Changes in the spatial distribution of significant and extreme hail events over the eastern US.** **a–c,** Spatial distribution of tendencies in occurrence frequency (shading, unit: counts/decade, with meshed areas denoting significant tendencies at the 95% confidence level) for hail events with *dhail* ≥ 2 (**a**), 2 ≤ *dhail* < 3 (**b**), and *dhail* ≥ 3 (**c**). Inset includes the average latitude time series (bottom-right, unit: °N) and the differences (bars) of the PDFs (curves, unit: %) between 2000–2010 and 2012–2022 (top-left). The PDF differences in panels (**a–b**) are statistically significant at the 90% confidence level. The black dashed lines denote the boundary (38°N) between the northeastern and southeastern US.


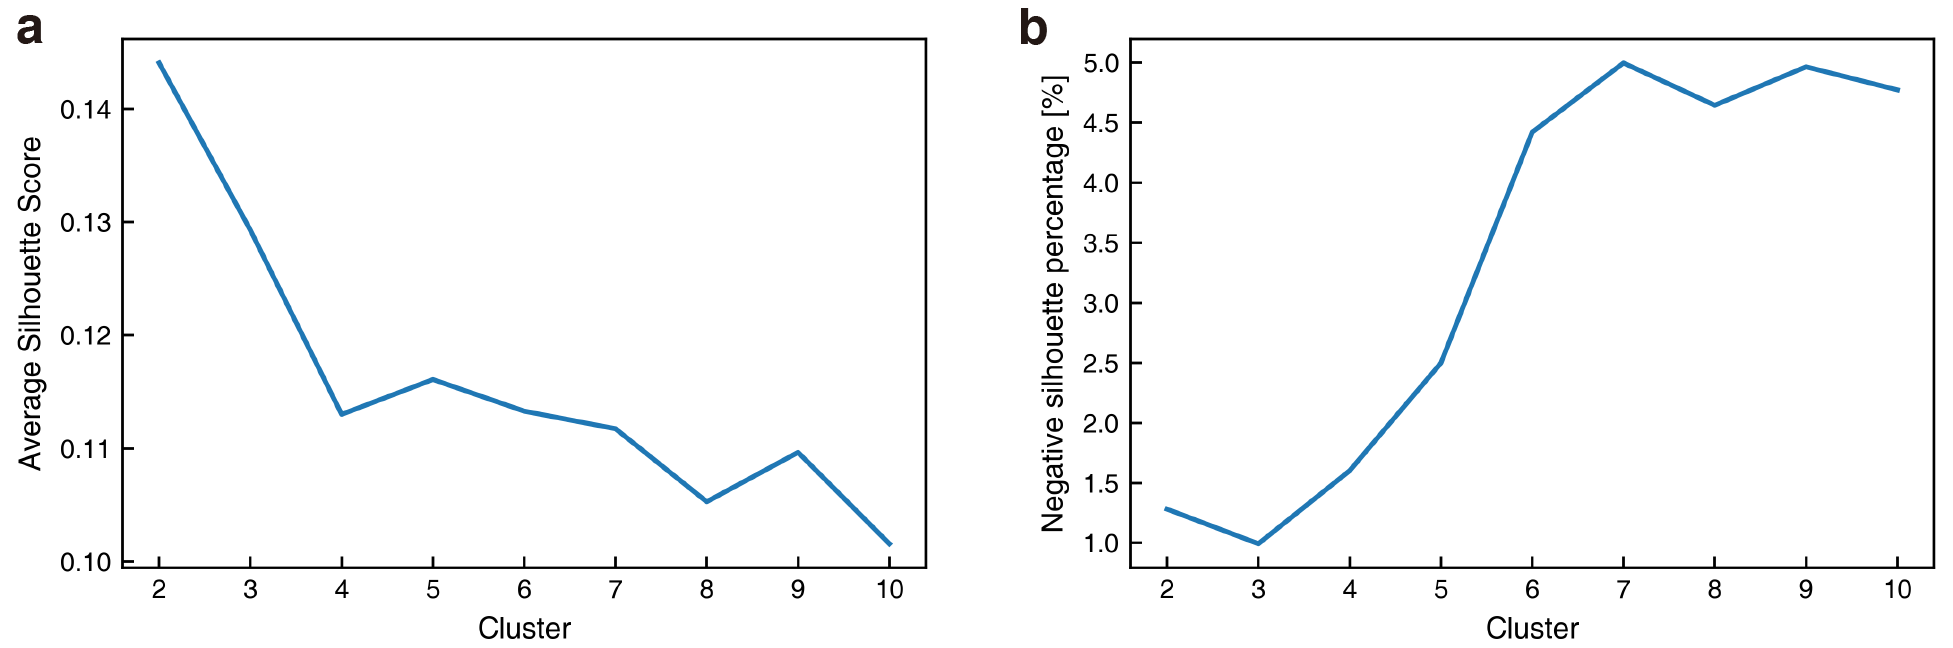


**Figure S3 | Determination of the number of hail-favoring weather types in the clustering calculation. a–b,** Average silhouette score (**a**) and negative silhouette percentage (**b**) against the number of clusters in the K-Means clustering calculation of hail-favoring weather types.


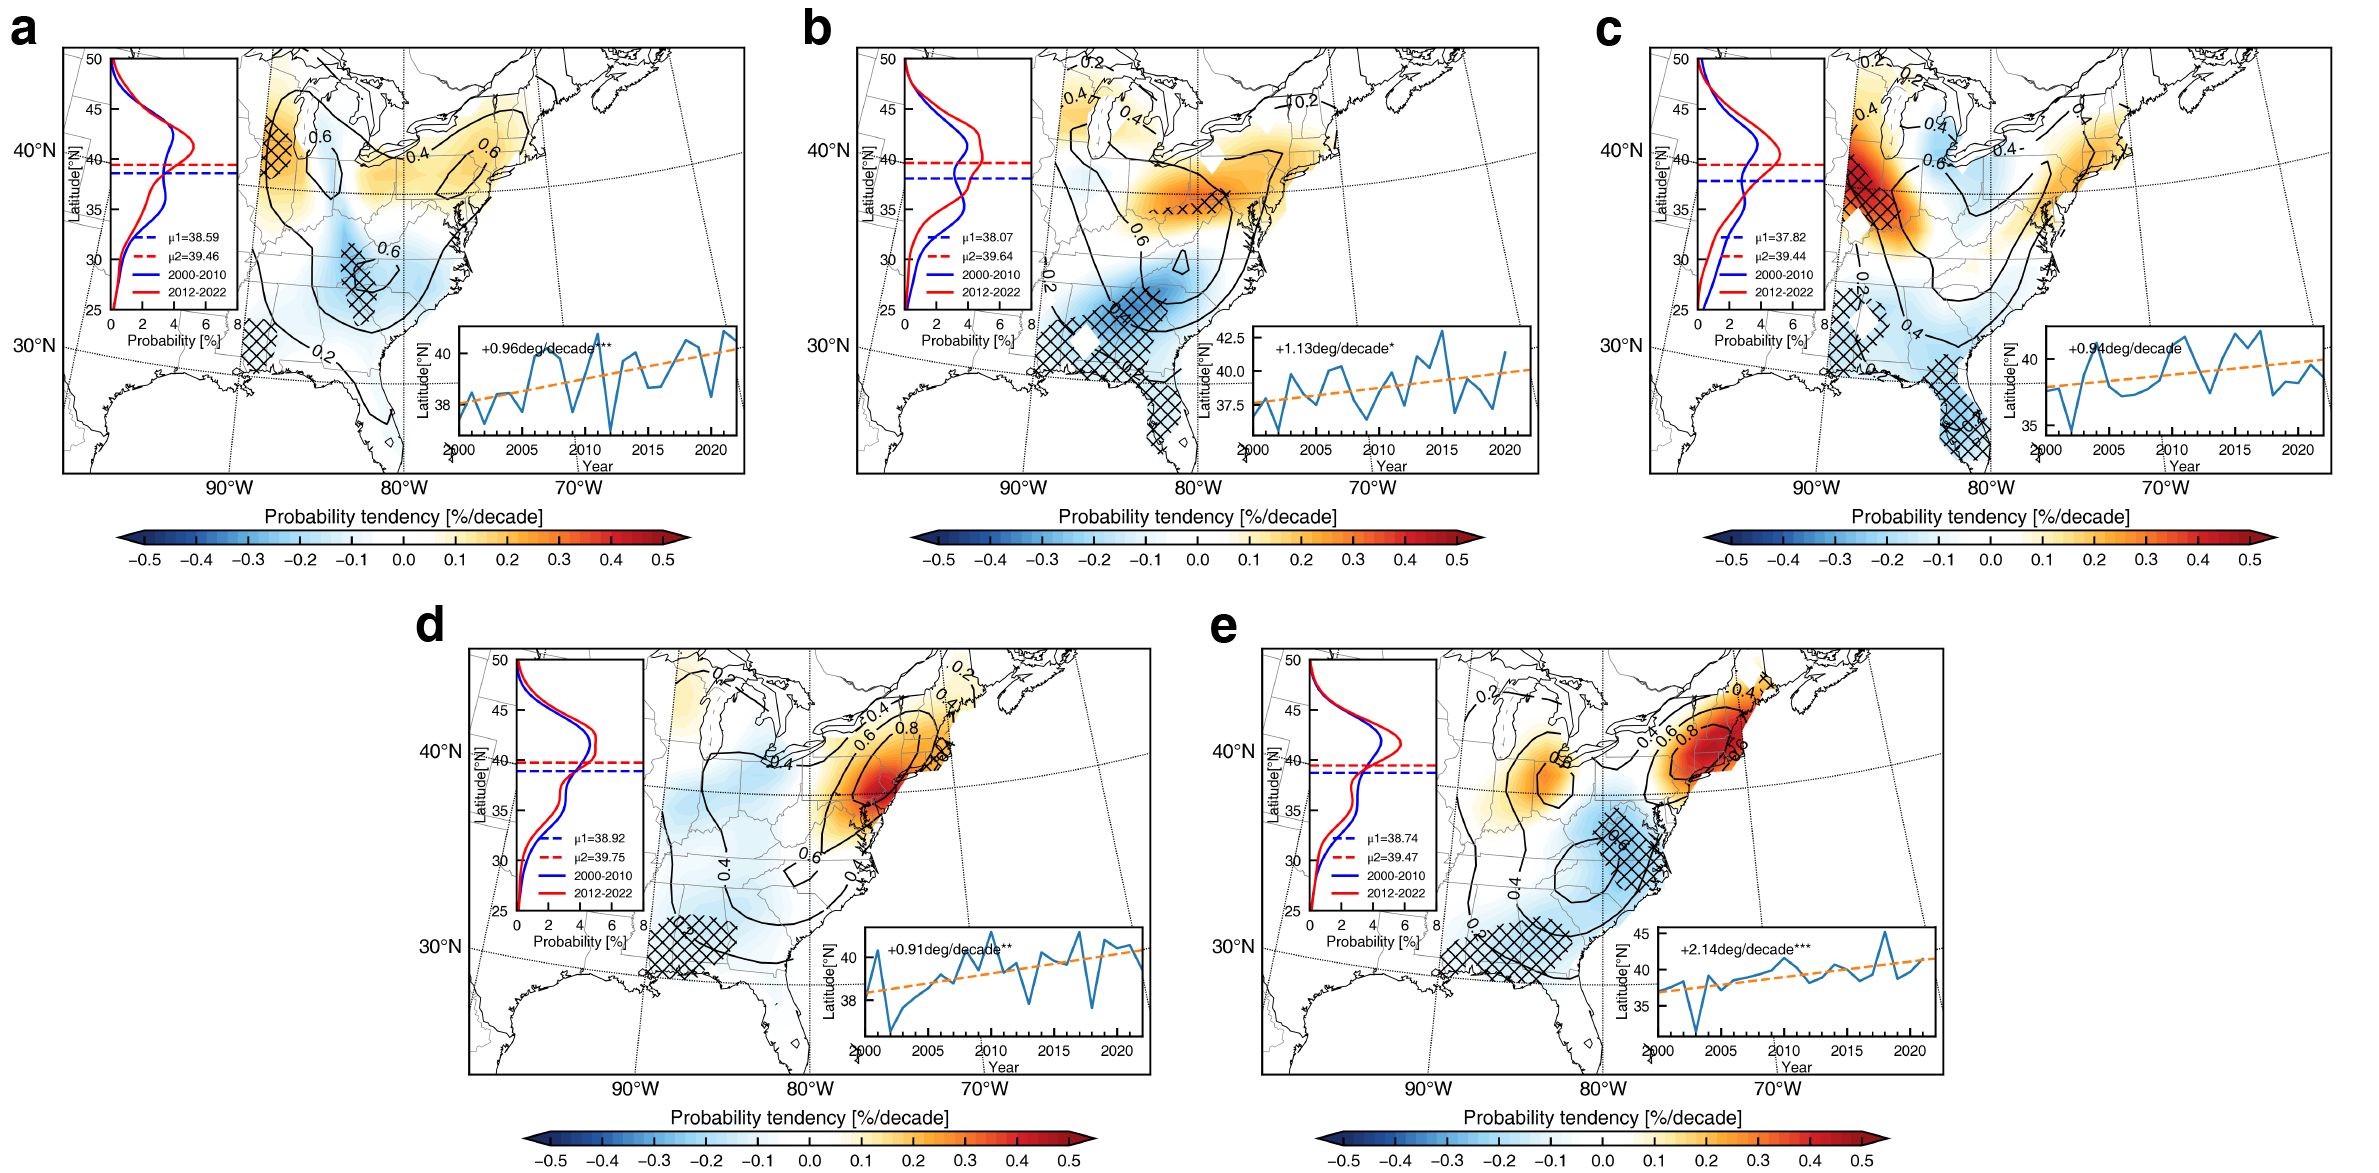


**Figure S4 | Change in hail activity of each hail-favoring weather type. a–e,** SPDF tendency (shading, unit: % decade-1, with meshed areas denoting significant tendencies at the 95% confidence level) for Type 1 (**a**), Type 2 (**b**), Type 3 (**c**), Type 4 (**d**), and Type 5 (**e**). Inset includes the average latitude time series (bottom-right, unit: °N) and the differences (bars) of the PDFs (curves, unit: %) between 2000–2010 and 2012–2022 (top-left). The PDF differences in all panels are statistically significant at the 99% confidence level. The results show that increasing latitudes of hail events are observed in all hail-favoring weather types, which indicates that the northward shift of northeastern US hailstorms may be caused by changes in the atmospheric climatic state.


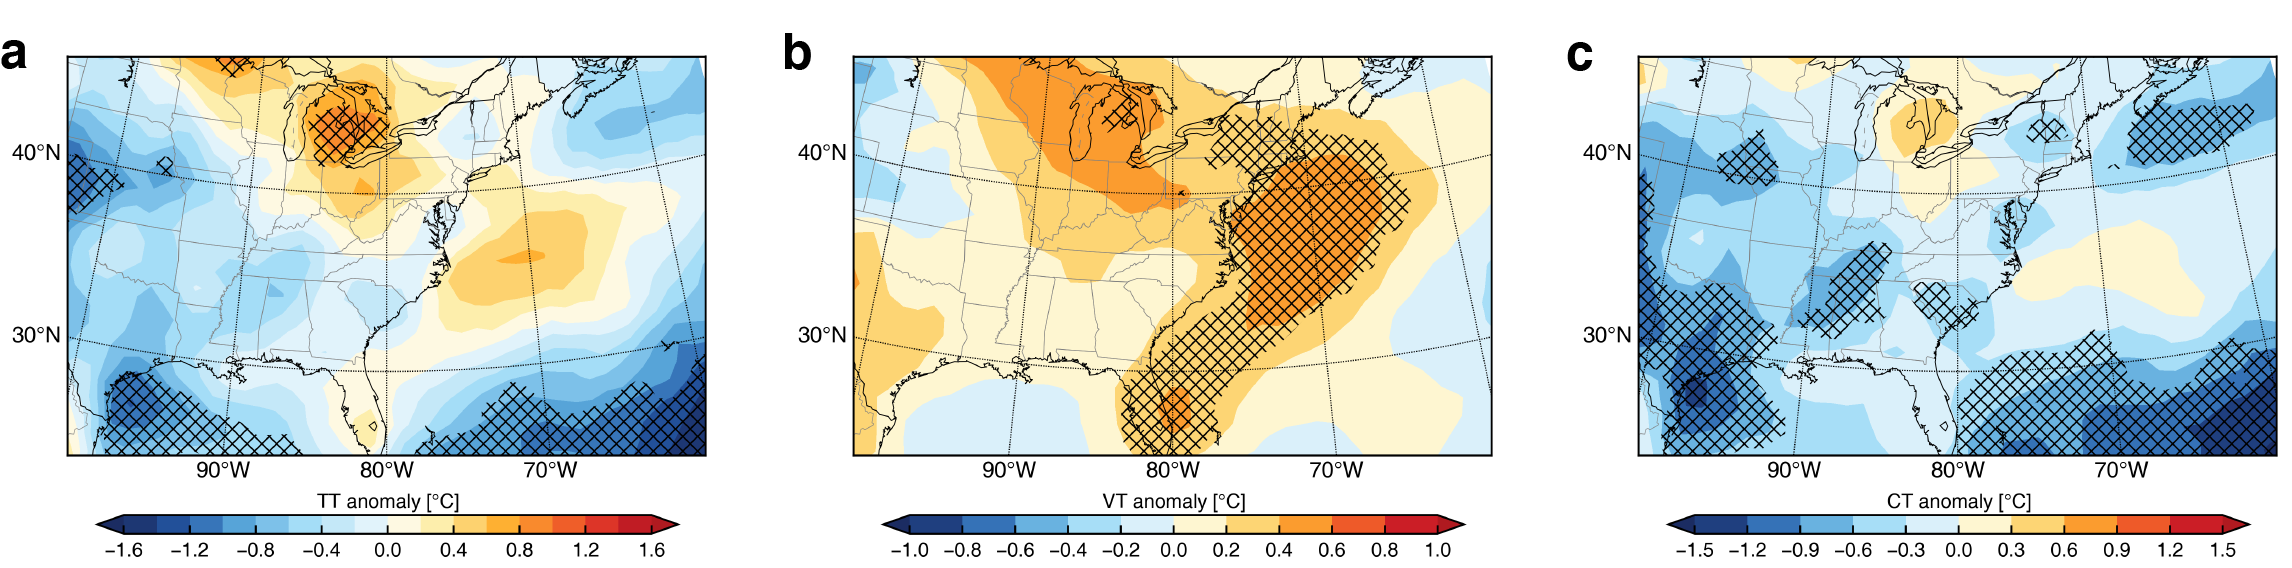


**Figure S5 | Spatial changes in atmospheric instability from 2000–2010 to 2012–2022. a–c,** Changes in TT (**a**, unit: °C), VT (**b**, unit: °C), and CT (**c**, unit: °C) from 2000–2010 to 2012–2022. Hatch marks denote significant changes in variables at the 95% confidence level.


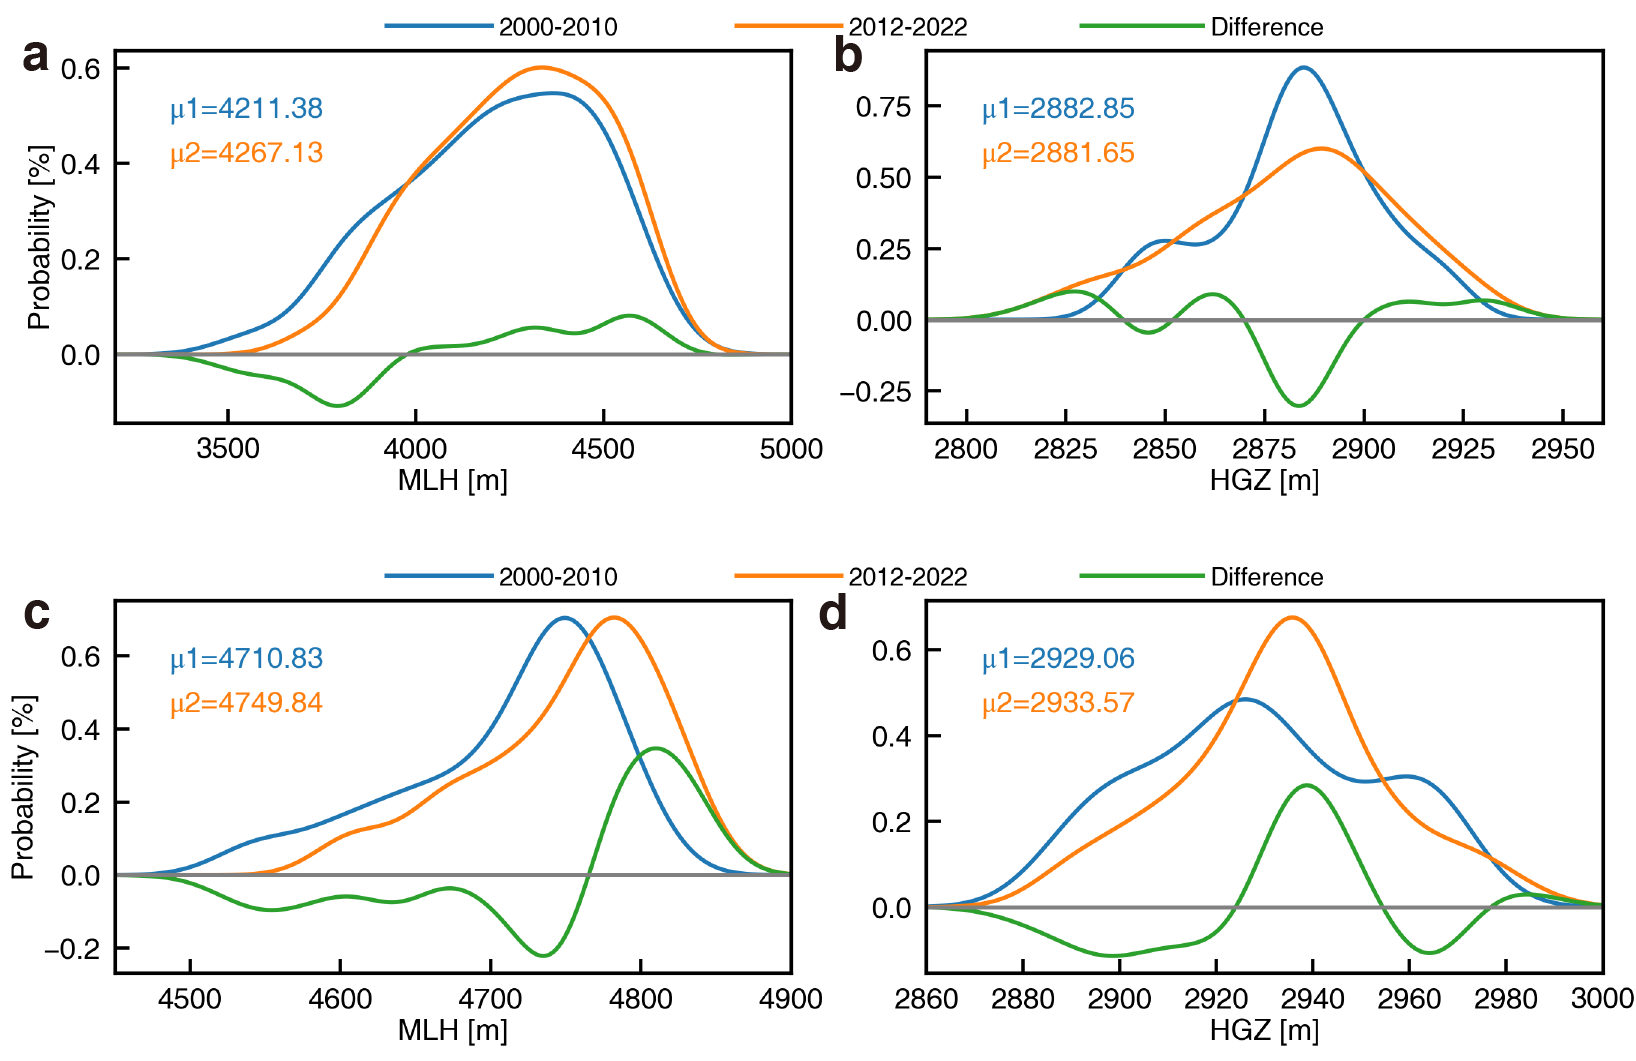


**Figure S6 | Changes in MLH and HGZ over the eastern US from 2000–2010 to 2012–2022. a–b,** PDFs of the MLH (unit: m) (**a**) and HGZ (unit: m) (**b**) over the northeastern US in 2000–2010 (blue line) and 2012–2022 (orange line). The green curves denote their differences. **c–d,** Same as (**a–b**), except over the southeastern US. The changes in PDFs in (**a–d**) are all statistically significant at the 90% confidence level. Analysis of the results show that the more frequent extreme MLH occurrence and reduced HGZ variance are both unfavorable for hail activity in the southeastern US.


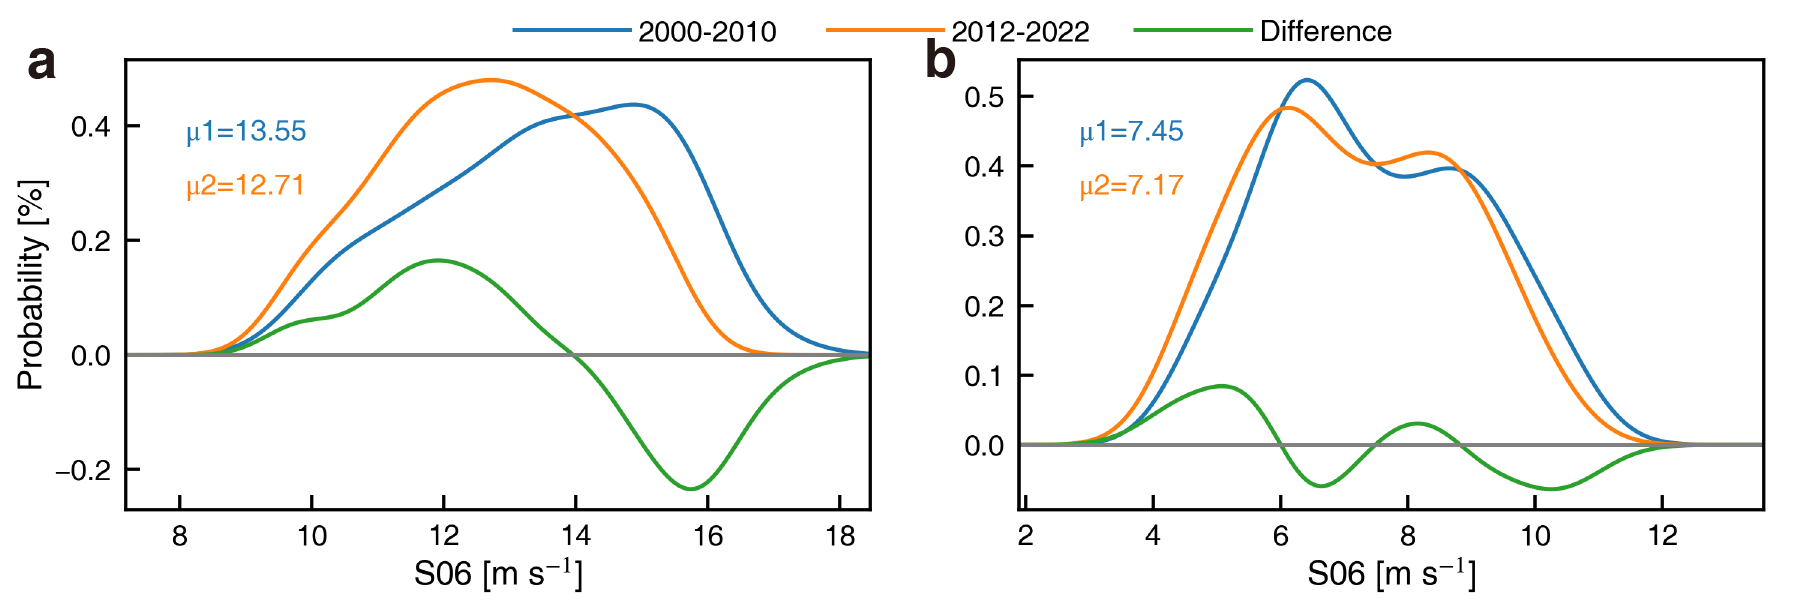


**Figure S7 | Changes in vertical wind shear over the eastern US from 2000–2010 to 2012–2022. a–b,** PDFs of vertical wind shear (unit: m s-1) over the northeastern (**a**) and southern (**b**) US in 2000–2010 (blue line) and 2012–2022 (orange line). The green curves denote their differences. The PDF change in (**a**) is statistically significant at the 99% confidence level.
